# Supplementary material for: Nitro-functionalization and luminescence quantum yield of Eu(iii) and Tb(iii) benzoic acid complexes
Source: Royal Society of Chemistry journal article supplement (doi:10.1039/b606970c), 2006-01-01
Supplement: b606970c.pdf [file b606970c.pdf]

# Nitro-Functionalization and Luminescence Quantum Yield of Eu(III) and Tb(III) Benzoic Acid Complexes

*Ana de Bettencourt-Dias, \* Subha Viswanathan.*

## Supplementary Information

Table 1. Bond lengths [Å] and angles [°] for **1**.

|              |           |               |           |
|--------------|-----------|---------------|-----------|
| C(1)-O(1)    | 1.261(8)  | C(9)-C(14)    | 1.377(10) |
| C(1)-O(14)#1 | 1.261(8)  | C(9)-C(10)    | 1.387(9)  |
| C(1)-C(2)    | 1.511(9)  | C(10)-C(11)   | 1.396(10) |
| C(2)-C(7)    | 1.383(10) | C(10)-H(10)   | 0.9500    |
| C(2)-C(3)    | 1.386(10) | C(11)-C(12)   | 1.368(11) |
| C(3)-C(4)    | 1.385(10) | C(11)-H(11)   | 0.9500    |
| C(3)-N(1)    | 1.474(10) | C(12)-C(13)   | 1.402(11) |
| C(4)-C(5)    | 1.366(12) | C(12)-H(12)   | 0.9500    |
| C(4)-H(4)    | 0.9500    | C(13)-C(14)   | 1.375(10) |
| C(5)-C(6)    | 1.395(11) | C(13)-H(13)   | 0.9500    |
| C(5)-H(5)    | 0.9500    | C(14)-N(2)    | 1.478(9)  |
| C(6)-C(7)    | 1.398(10) | C(15)-O(11)#1 | 1.248(8)  |
| C(6)-H(6)    | 0.9500    | C(15)-O(8)    | 1.268(8)  |
| C(7)-H(7)    | 0.9500    | C(15)-C(16)   | 1.500(10) |
| C(8)-O(5)    | 1.249(8)  | C(15)-Eu(1)   | 3.200(7)  |
| C(8)-O(4)    | 1.279(8)  | C(16)-C(17)   | 1.383(10) |
| C(8)-C(9)    | 1.512(9)  | C(16)-C(21)   | 1.401(10) |
| C(8)-Eu(1)   | 2.834(7)  | C(17)-C(18)   | 1.372(11) |

|               |           |              |           |
|---------------|-----------|--------------|-----------|
| C(17)-N(3)    | 1.479(10) | C(33)-C(34)  | 1.400(9)  |
| C(18)-C(19)   | 1.377(11) | C(33)-H(33)  | 0.9500    |
| C(18)-H(18)   | 0.9500    | C(34)-C(35)  | 1.385(10) |
| C(19)-C(20)   | 1.389(11) | C(34)-H(34)  | 0.9500    |
| C(19)-H(19)   | 0.9500    | C(35)-C(36)  | 1.378(10) |
| C(20)-C(21)   | 1.395(11) | C(35)-H(35)  | 0.9500    |
| C(20)-H(20)   | 0.9500    | C(36)-C(37)  | 1.390(9)  |
| C(21)-H(21)   | 0.9500    | C(36)-H(36)  | 0.9500    |
| C(22)-O(12)   | 1.416(9)  | C(37)-N(5)   | 1.479(9)  |
| C(22)-H(22A)  | 0.9800    | C(38)-O(23)  | 1.255(8)  |
| C(22)-H(22B)  | 0.9800    | C(38)-O(22)  | 1.271(8)  |
| C(22)-H(22C)  | 0.9800    | C(38)-C(39)  | 1.499(10) |
| C(23)-O(13)   | 1.444(8)  | C(38)-Eu(2)  | 2.930(7)  |
| C(23)-H(23A)  | 0.9800    | C(39)-C(44)  | 1.391(10) |
| C(23)-H(23B)  | 0.9800    | C(39)-C(40)  | 1.391(10) |
| C(23)-H(23C)  | 0.9800    | C(40)-C(41)  | 1.390(11) |
| C(24)-O(16)   | 1.261(8)  | C(40)-H(40)  | 0.9500    |
| C(24)-O(15)   | 1.266(8)  | C(41)-C(42)  | 1.362(12) |
| C(24)-C(25)   | 1.490(9)  | C(41)-H(41)  | 0.9500    |
| C(24)-Eu(2)   | 2.800(7)  | C(42)-C(43)  | 1.391(12) |
| C(25)-C(26)   | 1.392(9)  | C(42)-H(42)  | 0.9500    |
| C(25)-C(30)   | 1.392(10) | C(43)-C(44)  | 1.367(11) |
| C(26)-C(27)   | 1.387(10) | C(43)-H(43)  | 0.9500    |
| C(26)-H(26)   | 0.9500    | C(44)-N(6)   | 1.501(10) |
| C(27)-C(28)   | 1.379(11) | C(45)-O(27)  | 1.425(8)  |
| C(27)-H(27)   | 0.9500    | C(45)-H(45A) | 0.9800    |
| C(28)-C(29)   | 1.372(10) | C(45)-H(45B) | 0.9800    |
| C(28)-H(28)   | 0.9500    | C(45)-H(45C) | 0.9800    |
| C(29)-C(30)   | 1.365(10) | C(46)-O(28)  | 1.426(8)  |
| C(29)-H(29)   | 0.9500    | C(46)-H(46A) | 0.9800    |
| C(30)-N(4)    | 1.473(9)  | C(46)-H(46B) | 0.9800    |
| C(31)-O(19)   | 1.241(7)  | C(46)-H(46C) | 0.9800    |
| C(31)-O(26)#2 | 1.258(8)  | Eu(1)-O(11)  | 2.282(5)  |
| C(31)-C(32)   | 1.521(9)  | Eu(1)-O(14)  | 2.354(5)  |
| C(32)-C(33)   | 1.386(10) | Eu(1)-O(1)   | 2.382(5)  |
| C(32)-C(37)   | 1.387(10) | Eu(1)-O(4)   | 2.433(5)  |

|                   |            |                   |          |
|-------------------|------------|-------------------|----------|
| Eu(1)-O(8)        | 2.435(5)   | C(3)-C(2)-C(1)    | 123.9(6) |
| Eu(1)-O(12)       | 2.443(6)   | C(2)-C(3)-C(4)    | 122.6(7) |
| Eu(1)-O(13)       | 2.461(4)   | C(2)-C(3)-N(1)    | 119.7(7) |
| Eu(1)-O(5)        | 2.524(5)   | C(4)-C(3)-N(1)    | 117.5(7) |
| Eu(1)-Eu(1)#1     | 4.3507(13) | C(5)-C(4)-C(3)    | 118.9(7) |
| Eu(2)-O(19)       | 2.377(4)   | C(5)-C(4)-H(4)    | 120.5    |
| Eu(2)-O(22)#2     | 2.388(4)   | C(3)-C(4)-H(4)    | 120.5    |
| Eu(2)-O(15)       | 2.408(5)   | C(4)-C(5)-C(6)    | 120.6(7) |
| Eu(2)-O(26)       | 2.410(5)   | C(4)-C(5)-H(5)    | 119.7    |
| Eu(2)-O(28)       | 2.410(5)   | C(6)-C(5)-H(5)    | 119.7    |
| Eu(2)-O(27)       | 2.453(5)   | C(5)-C(6)-C(7)    | 119.3(7) |
| Eu(2)-O(16)       | 2.494(5)   | C(5)-C(6)-H(6)    | 120.3    |
| Eu(2)-O(23)       | 2.542(5)   | C(7)-C(6)-H(6)    | 120.3    |
| Eu(2)-O(22)       | 2.573(5)   | C(2)-C(7)-C(6)    | 121.0(7) |
| Eu(2)-Eu(2)#2     | 3.9428(11) | C(2)-C(7)-H(7)    | 119.5    |
| N(1)-O(2)         | 1.220(8)   | C(6)-C(7)-H(7)    | 119.5    |
| N(1)-O(3)         | 1.222(8)   | O(5)-C(8)-O(4)    | 121.6(6) |
| N(2)-O(7)         | 1.213(8)   | O(5)-C(8)-C(9)    | 119.8(6) |
| N(2)-O(6)         | 1.235(8)   | O(4)-C(8)-C(9)    | 118.4(6) |
| N(3)-O(10)        | 1.220(8)   | O(5)-C(8)-Eu(1)   | 62.9(3)  |
| N(3)-O(9)         | 1.230(8)   | O(4)-C(8)-Eu(1)   | 58.9(3)  |
| N(4)-O(18)        | 1.223(8)   | C(9)-C(8)-Eu(1)   | 170.8(5) |
| N(4)-O(17)        | 1.231(8)   | C(14)-C(9)-C(10)  | 117.4(6) |
| N(5)-O(20)        | 1.220(8)   | C(14)-C(9)-C(8)   | 125.7(6) |
| N(5)-O(21)        | 1.230(8)   | C(10)-C(9)-C(8)   | 116.6(6) |
| N(6)-O(25)        | 1.201(8)   | C(9)-C(10)-C(11)  | 120.9(7) |
| N(6)-O(24)        | 1.214(9)   | C(9)-C(10)-H(10)  | 119.6    |
| O(11)-C(15)#1     | 1.248(8)   | C(11)-C(10)-H(10) | 119.6    |
| O(14)-C(1)#1      | 1.261(8)   | C(12)-C(11)-C(10) | 120.1(7) |
| O(22)-Eu(2)#2     | 2.388(4)   | C(12)-C(11)-H(11) | 119.9    |
| O(26)-C(31)#2     | 1.258(8)   | C(10)-C(11)-H(11) | 119.9    |
| O(1)-C(1)-O(14)#1 | 127.2(6)   | C(11)-C(12)-C(13) | 120.1(7) |
| O(1)-C(1)-C(2)    | 116.1(6)   | C(11)-C(12)-H(12) | 120.0    |
| O(14)#1-C(1)-C(2) | 116.7(6)   | C(13)-C(12)-H(12) | 120.0    |
| C(7)-C(2)-C(3)    | 117.6(7)   | C(14)-C(13)-C(12) | 118.2(7) |
| C(7)-C(2)-C(1)    | 118.3(6)   | C(14)-C(13)-H(13) | 120.9    |

|                     |          |                     |          |
|---------------------|----------|---------------------|----------|
| C(12)-C(13)-H(13)   | 120.9    | H(23A)-C(23)-H(23B) | 109.5    |
| C(13)-C(14)-C(9)    | 123.3(7) | O(13)-C(23)-H(23C)  | 109.5    |
| C(13)-C(14)-N(2)    | 116.8(6) | H(23A)-C(23)-H(23C) | 109.5    |
| C(9)-C(14)-N(2)     | 119.8(6) | H(23B)-C(23)-H(23C) | 109.5    |
| O(11)#1-C(15)-O(8)  | 123.4(7) | O(16)-C(24)-O(15)   | 122.0(6) |
| O(11)#1-C(15)-C(16) | 117.6(6) | O(16)-C(24)-C(25)   | 120.0(6) |
| O(8)-C(15)-C(16)    | 118.9(6) | O(15)-C(24)-C(25)   | 117.9(6) |
| O(11)#1-C(15)-Eu(1) | 80.6(4)  | O(16)-C(24)-Eu(2)   | 63.0(4)  |
| O(8)-C(15)-Eu(1)    | 43.2(3)  | O(15)-C(24)-Eu(2)   | 59.0(3)  |
| C(16)-C(15)-Eu(1)   | 159.6(5) | C(25)-C(24)-Eu(2)   | 174.5(5) |
| C(17)-C(16)-C(21)   | 117.2(7) | C(26)-C(25)-C(30)   | 116.1(6) |
| C(17)-C(16)-C(15)   | 126.7(7) | C(26)-C(25)-C(24)   | 119.3(6) |
| C(21)-C(16)-C(15)   | 116.0(6) | C(30)-C(25)-C(24)   | 124.3(6) |
| C(18)-C(17)-C(16)   | 122.9(7) | C(27)-C(26)-C(25)   | 121.5(7) |
| C(18)-C(17)-N(3)    | 117.9(7) | C(27)-C(26)-H(26)   | 119.3    |
| C(16)-C(17)-N(3)    | 119.2(7) | C(25)-C(26)-H(26)   | 119.3    |
| C(17)-C(18)-C(19)   | 119.2(7) | C(28)-C(27)-C(26)   | 119.3(7) |
| C(17)-C(18)-H(18)   | 120.4    | C(28)-C(27)-H(27)   | 120.3    |
| C(19)-C(18)-H(18)   | 120.4    | C(26)-C(27)-H(27)   | 120.3    |
| C(18)-C(19)-C(20)   | 120.5(7) | C(29)-C(28)-C(27)   | 120.9(7) |
| C(18)-C(19)-H(19)   | 119.7    | C(29)-C(28)-H(28)   | 119.6    |
| C(20)-C(19)-H(19)   | 119.7    | C(27)-C(28)-H(28)   | 119.6    |
| C(19)-C(20)-C(21)   | 119.2(7) | C(30)-C(29)-C(28)   | 118.5(7) |
| C(19)-C(20)-H(20)   | 120.4    | C(30)-C(29)-H(29)   | 120.7    |
| C(21)-C(20)-H(20)   | 120.4    | C(28)-C(29)-H(29)   | 120.7    |
| C(20)-C(21)-C(16)   | 121.0(7) | C(29)-C(30)-C(25)   | 123.5(7) |
| C(20)-C(21)-H(21)   | 119.5    | C(29)-C(30)-N(4)    | 116.7(6) |
| C(16)-C(21)-H(21)   | 119.5    | C(25)-C(30)-N(4)    | 119.7(6) |
| O(12)-C(22)-H(22A)  | 109.5    | O(19)-C(31)-O(26)#2 | 127.7(6) |
| O(12)-C(22)-H(22B)  | 109.5    | O(19)-C(31)-C(32)   | 116.4(6) |
| H(22A)-C(22)-H(22B) | 109.5    | O(26)#2-C(31)-C(32) | 115.8(6) |
| O(12)-C(22)-H(22C)  | 109.5    | C(33)-C(32)-C(37)   | 116.0(6) |
| H(22A)-C(22)-H(22C) | 109.5    | C(33)-C(32)-C(31)   | 119.6(6) |
| H(22B)-C(22)-H(22C) | 109.5    | C(37)-C(32)-C(31)   | 124.2(6) |
| O(13)-C(23)-H(23A)  | 109.5    | C(32)-C(33)-C(34)   | 120.8(7) |
| O(13)-C(23)-H(23B)  | 109.5    | C(32)-C(33)-H(33)   | 119.6    |

|                   |          |                     |            |
|-------------------|----------|---------------------|------------|
| C(34)-C(33)-H(33) | 119.6    | C(39)-C(44)-N(6)    | 118.7(7)   |
| C(35)-C(34)-C(33) | 121.0(7) | O(27)-C(45)-H(45A)  | 109.5      |
| C(35)-C(34)-H(34) | 119.5    | O(27)-C(45)-H(45B)  | 109.5      |
| C(33)-C(34)-H(34) | 119.5    | H(45A)-C(45)-H(45B) | 109.5      |
| C(36)-C(35)-C(34) | 119.8(6) | O(27)-C(45)-H(45C)  | 109.5      |
| C(36)-C(35)-H(35) | 120.1    | H(45A)-C(45)-H(45C) | 109.5      |
| C(34)-C(35)-H(35) | 120.1    | H(45B)-C(45)-H(45C) | 109.5      |
| C(35)-C(36)-C(37) | 117.5(7) | O(28)-C(46)-H(46A)  | 109.5      |
| C(35)-C(36)-H(36) | 121.3    | O(28)-C(46)-H(46B)  | 109.5      |
| C(37)-C(36)-H(36) | 121.3    | H(46A)-C(46)-H(46B) | 109.5      |
| C(32)-C(37)-C(36) | 124.9(7) | O(28)-C(46)-H(46C)  | 109.5      |
| C(32)-C(37)-N(5)  | 119.0(6) | H(46A)-C(46)-H(46C) | 109.5      |
| C(36)-C(37)-N(5)  | 116.1(6) | H(46B)-C(46)-H(46C) | 109.5      |
| O(23)-C(38)-O(22) | 120.7(7) | O(11)-Eu(1)-O(14)   | 76.52(17)  |
| O(23)-C(38)-C(39) | 119.9(6) | O(11)-Eu(1)-O(1)    | 75.83(17)  |
| O(22)-C(38)-C(39) | 119.1(6) | O(14)-Eu(1)-O(1)    | 124.85(16) |
| O(23)-C(38)-Eu(2) | 59.8(4)  | O(11)-Eu(1)-O(4)    | 134.21(17) |
| O(22)-C(38)-Eu(2) | 61.2(4)  | O(14)-Eu(1)-O(4)    | 147.51(16) |
| C(39)-C(38)-Eu(2) | 179.5(5) | O(1)-Eu(1)-O(4)     | 80.14(16)  |
| C(44)-C(39)-C(40) | 116.7(7) | O(11)-Eu(1)-O(8)    | 120.45(18) |
| C(44)-C(39)-C(38) | 124.9(6) | O(14)-Eu(1)-O(8)    | 79.72(17)  |
| C(40)-C(39)-C(38) | 118.3(7) | O(1)-Eu(1)-O(8)     | 74.84(16)  |
| C(41)-C(40)-C(39) | 119.3(8) | O(4)-Eu(1)-O(8)     | 89.07(16)  |
| C(41)-C(40)-H(40) | 120.3    | O(11)-Eu(1)-O(12)   | 83.6(2)    |
| C(39)-C(40)-H(40) | 120.3    | O(14)-Eu(1)-O(12)   | 78.47(19)  |
| C(42)-C(41)-C(40) | 122.8(8) | O(1)-Eu(1)-O(12)    | 142.64(18) |
| C(42)-C(41)-H(41) | 118.6    | O(4)-Eu(1)-O(12)    | 93.0(2)    |
| C(40)-C(41)-H(41) | 118.6    | O(8)-Eu(1)-O(12)    | 142.19(18) |
| C(41)-C(42)-C(43) | 118.6(7) | O(11)-Eu(1)-O(13)   | 147.34(17) |
| C(41)-C(42)-H(42) | 120.7    | O(14)-Eu(1)-O(13)   | 78.89(16)  |
| C(43)-C(42)-H(42) | 120.7    | O(1)-Eu(1)-O(13)    | 136.59(16) |
| C(44)-C(43)-C(42) | 118.6(8) | O(4)-Eu(1)-O(13)    | 68.75(16)  |
| C(44)-C(43)-H(43) | 120.7    | O(8)-Eu(1)-O(13)    | 75.14(16)  |
| C(42)-C(43)-H(43) | 120.7    | O(12)-Eu(1)-O(13)   | 70.60(19)  |
| C(43)-C(44)-C(39) | 123.9(7) | O(11)-Eu(1)-O(5)    | 83.18(17)  |
| C(43)-C(44)-N(6)  | 117.4(7) | O(14)-Eu(1)-O(5)    | 145.92(17) |

|                     |            |                     |            |
|---------------------|------------|---------------------|------------|
| O(1)-Eu(1)-O(5)     | 74.59(16)  | O(22)#2-Eu(2)-O(26) | 73.02(16)  |
| O(4)-Eu(1)-O(5)     | 52.84(15)  | O(15)-Eu(2)-O(26)   | 79.99(16)  |
| O(8)-Eu(1)-O(5)     | 134.36(16) | O(19)-Eu(2)-O(28)   | 76.08(16)  |
| O(12)-Eu(1)-O(5)    | 72.23(18)  | O(22)#2-Eu(2)-O(28) | 141.78(16) |
| O(13)-Eu(1)-O(5)    | 106.58(16) | O(15)-Eu(2)-O(28)   | 85.74(17)  |
| O(11)-Eu(1)-C(8)    | 108.29(19) | O(26)-Eu(2)-O(28)   | 142.76(16) |
| O(14)-Eu(1)-C(8)    | 160.02(18) | O(19)-Eu(2)-O(27)   | 138.11(16) |
| O(1)-Eu(1)-C(8)     | 74.79(17)  | O(22)#2-Eu(2)-O(27) | 143.61(15) |
| O(4)-Eu(1)-C(8)     | 26.74(17)  | O(15)-Eu(2)-O(27)   | 73.54(16)  |
| O(8)-Eu(1)-C(8)     | 112.14(18) | O(26)-Eu(2)-O(27)   | 72.06(16)  |
| O(12)-Eu(1)-C(8)    | 82.8(2)    | O(28)-Eu(2)-O(27)   | 70.93(16)  |
| O(13)-Eu(1)-C(8)    | 88.49(17)  | O(19)-Eu(2)-O(16)   | 75.74(16)  |
| O(5)-Eu(1)-C(8)     | 26.15(17)  | O(22)#2-Eu(2)-O(16) | 74.01(16)  |
| O(11)-Eu(1)-C(15)   | 99.58(19)  | O(15)-Eu(2)-O(16)   | 53.57(15)  |
| O(14)-Eu(1)-C(15)   | 73.12(17)  | O(26)-Eu(2)-O(16)   | 121.46(16) |
| O(1)-Eu(1)-C(15)    | 65.80(17)  | O(28)-Eu(2)-O(16)   | 73.37(16)  |
| O(4)-Eu(1)-C(15)    | 105.24(17) | O(27)-Eu(2)-O(16)   | 117.02(16) |
| O(8)-Eu(1)-C(15)    | 20.88(16)  | O(19)-Eu(2)-O(23)   | 79.96(16)  |
| O(12)-Eu(1)-C(15)   | 149.70(19) | O(22)#2-Eu(2)-O(23) | 125.18(16) |
| O(13)-Eu(1)-C(15)   | 93.45(17)  | O(15)-Eu(2)-O(23)   | 140.48(16) |
| O(5)-Eu(1)-C(15)    | 138.02(17) | O(26)-Eu(2)-O(23)   | 94.04(17)  |
| C(8)-Eu(1)-C(15)    | 123.56(18) | O(28)-Eu(2)-O(23)   | 75.67(16)  |
| O(11)-Eu(1)-Eu(1)#1 | 46.59(14)  | O(27)-Eu(2)-O(23)   | 67.53(16)  |
| O(14)-Eu(1)-Eu(1)#1 | 64.54(12)  | O(16)-Eu(2)-O(23)   | 144.30(16) |
| O(1)-Eu(1)-Eu(1)#1  | 61.69(11)  | O(19)-Eu(2)-O(22)   | 72.10(15)  |
| O(4)-Eu(1)-Eu(1)#1  | 140.92(12) | O(22)#2-Eu(2)-O(22) | 74.78(17)  |
| O(8)-Eu(1)-Eu(1)#1  | 73.88(11)  | O(15)-Eu(2)-O(22)   | 151.40(15) |
| O(12)-Eu(1)-Eu(1)#1 | 122.03(17) | O(26)-Eu(2)-O(22)   | 72.32(15)  |
| O(13)-Eu(1)-Eu(1)#1 | 135.31(12) | O(28)-Eu(2)-O(22)   | 120.90(16) |
| O(5)-Eu(1)-Eu(1)#1  | 118.11(11) | O(27)-Eu(2)-O(22)   | 103.74(16) |
| C(8)-Eu(1)-Eu(1)#1  | 133.06(13) | O(16)-Eu(2)-O(22)   | 139.15(15) |
| C(15)-Eu(1)-Eu(1)#1 | 53.04(12)  | O(23)-Eu(2)-O(22)   | 50.84(15)  |
| O(19)-Eu(2)-O(22)#2 | 77.05(16)  | O(19)-Eu(2)-C(24)   | 102.49(18) |
| O(19)-Eu(2)-O(15)   | 129.21(16) | O(22)#2-Eu(2)-C(24) | 81.17(18)  |
| O(22)#2-Eu(2)-O(15) | 90.65(17)  | O(15)-Eu(2)-C(24)   | 26.80(18)  |
| O(19)-Eu(2)-O(26)   | 138.18(16) | O(26)-Eu(2)-C(24)   | 101.04(18) |

|                       |            |                     |            |
|-----------------------|------------|---------------------|------------|
| O(28)-Eu(2)-C(24)     | 78.68(18)  | O(6)-N(2)-C(14)     | 116.7(6)   |
| O(27)-Eu(2)-C(24)     | 95.70(18)  | O(10)-N(3)-O(9)     | 123.6(7)   |
| O(16)-Eu(2)-C(24)     | 26.77(17)  | O(10)-N(3)-C(17)    | 118.3(6)   |
| O(23)-Eu(2)-C(24)     | 152.82(17) | O(9)-N(3)-C(17)     | 118.0(7)   |
| O(22)-Eu(2)-C(24)     | 155.95(17) | O(18)-N(4)-O(17)    | 125.0(6)   |
| O(19)-Eu(2)-C(38)     | 76.03(17)  | O(18)-N(4)-C(30)    | 118.3(6)   |
| O(22)#2-Eu(2)-C(38)   | 100.38(18) | O(17)-N(4)-C(30)    | 116.6(6)   |
| O(15)-Eu(2)-C(38)     | 154.46(17) | O(20)-N(5)-O(21)    | 123.2(6)   |
| O(26)-Eu(2)-C(38)     | 81.33(18)  | O(20)-N(5)-C(37)    | 119.1(6)   |
| O(28)-Eu(2)-C(38)     | 98.95(18)  | O(21)-N(5)-C(37)    | 117.6(6)   |
| O(27)-Eu(2)-C(38)     | 84.24(18)  | O(25)-N(6)-O(24)    | 125.7(7)   |
| O(16)-Eu(2)-C(38)     | 151.76(16) | O(25)-N(6)-C(44)    | 117.5(7)   |
| O(23)-Eu(2)-C(38)     | 25.27(17)  | O(24)-N(6)-C(44)    | 116.8(6)   |
| O(22)-Eu(2)-C(38)     | 25.66(16)  | C(1)-O(1)-Eu(1)     | 141.8(4)   |
| C(24)-Eu(2)-C(38)     | 177.49(18) | C(8)-O(4)-Eu(1)     | 94.4(4)    |
| O(19)-Eu(2)-Eu(2)#2   | 70.35(11)  | C(8)-O(5)-Eu(1)     | 90.9(4)    |
| O(22)#2-Eu(2)-Eu(2)#2 | 39.02(11)  | C(15)-O(8)-Eu(1)    | 115.9(4)   |
| O(15)-Eu(2)-Eu(2)#2   | 125.43(12) | C(15)#1-O(11)-Eu(1) | 174.0(5)   |
| O(26)-Eu(2)-Eu(2)#2   | 67.97(11)  | C(22)-O(12)-Eu(1)   | 134.8(5)   |
| O(28)-Eu(2)-Eu(2)#2   | 144.18(11) | C(23)-O(13)-Eu(1)   | 132.5(4)   |
| O(27)-Eu(2)-Eu(2)#2   | 129.98(11) | C(1)#1-O(14)-Eu(1)  | 139.0(4)   |
| O(16)-Eu(2)-Eu(2)#2   | 109.07(11) | C(24)-O(15)-Eu(2)   | 94.2(4)    |
| O(23)-Eu(2)-Eu(2)#2   | 86.38(11)  | C(24)-O(16)-Eu(2)   | 90.3(4)    |
| O(22)-Eu(2)-Eu(2)#2   | 35.76(10)  | C(31)-O(19)-Eu(2)   | 135.5(4)   |
| C(24)-Eu(2)-Eu(2)#2   | 120.19(14) | C(38)-O(22)-Eu(2)#2 | 161.3(4)   |
| C(38)-Eu(2)-Eu(2)#2   | 61.38(14)  | C(38)-O(22)-Eu(2)   | 93.1(4)    |
| O(2)-N(1)-O(3)        | 123.9(7)   | Eu(2)#2-O(22)-Eu(2) | 105.22(17) |
| O(2)-N(1)-C(3)        | 117.6(7)   | C(38)-O(23)-Eu(2)   | 94.9(4)    |
| O(3)-N(1)-C(3)        | 118.4(6)   | C(31)#2-O(26)-Eu(2) | 137.9(4)   |
| O(7)-N(2)-O(6)        | 125.0(6)   | C(45)-O(27)-Eu(2)   | 130.6(4)   |
| O(7)-N(2)-C(14)       | 118.3(6)   | C(46)-O(28)-Eu(2)   | 130.4(4)   |

---

Symmetry transformations used to generate equivalent atoms:

#1 -x+2,-y+1,-z+1 #2 -x+2,-y+1,-z

Table 2. Bond lengths [Å] and angles [°] for **2**.

|               |          |                |          |
|---------------|----------|----------------|----------|
| C(1)-C(6)     | 1.390(4) | C(17)-H(17)    | 0.9500   |
| C(1)-C(2)     | 1.394(4) | C(18)-C(19)    | 1.386(4) |
| C(1)-C(7)     | 1.504(4) | C(18)-H(18)    | 0.9500   |
| C(2)-C(3)     | 1.388(4) | C(19)-C(20)    | 1.376(4) |
| C(2)-H(2A)    | 0.9500   | C(19)-N(3)     | 1.467(4) |
| C(3)-C(4)     | 1.386(4) | C(20)-H(20)    | 0.9500   |
| C(3)-N(1)     | 1.465(4) | C(21)-O(9)     | 1.264(3) |
| C(4)-C(5)     | 1.384(4) | C(21)-O(8)     | 1.265(4) |
| C(4)-H(4)     | 0.9500   | C(22)-O(15)    | 1.442(4) |
| C(5)-C(6)     | 1.392(4) | C(22)-C(23)    | 1.503(5) |
| C(5)-H(5)     | 0.9500   | C(22)-H(22A)   | 0.9900   |
| C(6)-H(6)     | 0.9500   | C(22)-H(22B)   | 0.9900   |
| C(7)-O(13)#1  | 1.249(3) | C(23)-H(23A)   | 0.9800   |
| C(7)-O(1)     | 1.252(4) | C(23)-H(23B)   | 0.9800   |
| C(8)-C(9)     | 1.387(4) | C(23)-H(23C)   | 0.9800   |
| C(8)-C(13)    | 1.398(4) | C(26)-O(17)    | 1.349(7) |
| C(8)-C(14)    | 1.496(4) | Eu(1)-O(13)    | 2.307(2) |
| C(9)-C(10)    | 1.383(4) | Eu(1)-O(1)     | 2.329(2) |
| C(9)-H(9)     | 0.9500   | Eu(1)-O(14)    | 2.355(2) |
| C(10)-C(11)   | 1.384(4) | Eu(1)-O(4)     | 2.372(2) |
| C(10)-N(2)    | 1.475(4) | Eu(1)-O(12)    | 2.412(2) |
| C(11)-C(12)   | 1.381(5) | Eu(1)-O(8)     | 2.468(2) |
| C(11)-H(11A)  | 0.9500   | Eu(1)-O(15)    | 2.509(2) |
| C(12)-C(13)   | 1.391(4) | Eu(1)-O(9)     | 2.541(2) |
| C(12)-H(12)   | 0.9500   | N(1)-O(3)      | 1.213(4) |
| C(13)-H(13)   | 0.9500   | N(1)-O(2)      | 1.235(3) |
| C(14)-O(4)    | 1.258(3) | N(2)-O(6)      | 1.218(4) |
| C(14)-O(14)#2 | 1.259(3) | N(2)-O(7)      | 1.228(4) |
| C(15)-C(20)   | 1.388(4) | N(3)-O(10)     | 1.228(4) |
| C(15)-C(16)   | 1.399(4) | N(3)-O(11)     | 1.233(4) |
| C(15)-C(21)   | 1.503(4) | O(13)-C(7)#1   | 1.249(3) |
| C(16)-C(17)   | 1.388(4) | O(14)-C(14)#2  | 1.259(3) |
| C(16)-H(16)   | 0.9500   | O(17)-O(17)#3  | 1.509(9) |
| C(17)-C(18)   | 1.390(5) | C(6)-C(1)-C(2) | 120.3(3) |



|                    |          |                     |          |
|--------------------|----------|---------------------|----------|
| C(6)-C(1)-C(7)     | 119.9(3) | C(12)-C(13)-H(13)   | 119.7    |
| C(2)-C(1)-C(7)     | 119.8(3) | C(8)-C(13)-H(13)    | 119.7    |
| C(3)-C(2)-C(1)     | 117.5(3) | O(4)-C(14)-O(14)#2  | 122.9(3) |
| C(3)-C(2)-H(2A)    | 121.2    | O(4)-C(14)-C(8)     | 117.7(3) |
| C(1)-C(2)-H(2A)    | 121.2    | O(14)#2-C(14)-C(8)  | 119.4(3) |
| C(4)-C(3)-C(2)     | 123.5(3) | C(20)-C(15)-C(16)   | 119.9(3) |
| C(4)-C(3)-N(1)     | 118.4(3) | C(20)-C(15)-C(21)   | 119.4(3) |
| C(2)-C(3)-N(1)     | 118.1(3) | C(16)-C(15)-C(21)   | 120.7(3) |
| C(5)-C(4)-C(3)     | 117.8(3) | C(17)-C(16)-C(15)   | 120.2(3) |
| C(5)-C(4)-H(4)     | 121.1    | C(17)-C(16)-H(16)   | 119.9    |
| C(3)-C(4)-H(4)     | 121.1    | C(15)-C(16)-H(16)   | 119.9    |
| C(4)-C(5)-C(6)     | 120.4(3) | C(16)-C(17)-C(18)   | 120.4(3) |
| C(4)-C(5)-H(5)     | 119.8    | C(16)-C(17)-H(17)   | 119.8    |
| C(6)-C(5)-H(5)     | 119.8    | C(18)-C(17)-H(17)   | 119.8    |
| C(1)-C(6)-C(5)     | 120.5(3) | C(19)-C(18)-C(17)   | 117.9(3) |
| C(1)-C(6)-H(6)     | 119.8    | C(19)-C(18)-H(18)   | 121.1    |
| C(5)-C(6)-H(6)     | 119.8    | C(17)-C(18)-H(18)   | 121.1    |
| O(13)#1-C(7)-O(1)  | 124.8(3) | C(20)-C(19)-C(18)   | 123.1(3) |
| O(13)#1-C(7)-C(1)  | 117.7(3) | C(20)-C(19)-N(3)    | 117.9(3) |
| O(1)-C(7)-C(1)     | 117.5(2) | C(18)-C(19)-N(3)    | 119.0(3) |
| C(9)-C(8)-C(13)    | 119.7(3) | C(19)-C(20)-C(15)   | 118.4(3) |
| C(9)-C(8)-C(14)    | 119.5(3) | C(19)-C(20)-H(20)   | 120.8    |
| C(13)-C(8)-C(14)   | 120.8(3) | C(15)-C(20)-H(20)   | 120.8    |
| C(10)-C(9)-C(8)    | 118.3(3) | O(9)-C(21)-O(8)     | 121.5(3) |
| C(10)-C(9)-H(9)    | 120.9    | O(9)-C(21)-C(15)    | 119.7(3) |
| C(8)-C(9)-H(9)     | 120.9    | O(8)-C(21)-C(15)    | 118.9(3) |
| C(9)-C(10)-C(11)   | 123.0(3) | O(15)-C(22)-C(23)   | 112.5(3) |
| C(9)-C(10)-N(2)    | 118.1(3) | O(15)-C(22)-H(22A)  | 109.1    |
| C(11)-C(10)-N(2)   | 118.8(3) | C(23)-C(22)-H(22A)  | 109.1    |
| C(12)-C(11)-C(10)  | 118.2(3) | O(15)-C(22)-H(22B)  | 109.1    |
| C(12)-C(11)-H(11A) | 120.9    | C(23)-C(22)-H(22B)  | 109.1    |
| C(10)-C(11)-H(11A) | 120.9    | H(22A)-C(22)-H(22B) | 107.8    |
| C(11)-C(12)-C(13)  | 120.2(3) | C(22)-C(23)-H(23A)  | 109.5    |
| C(11)-C(12)-H(12)  | 119.9    | C(22)-C(23)-H(23B)  | 109.5    |
| C(13)-C(12)-H(12)  | 119.9    | H(23A)-C(23)-H(23B) | 109.5    |
| C(12)-C(13)-C(8)   | 120.6(3) | C(22)-C(23)-H(23C)  | 109.5    |

|                     |           |                     |            |
|---------------------|-----------|---------------------|------------|
| H(23A)-C(23)-H(23C) | 109.5     | O(1)-Eu(1)-O(9)     | 77.46(8)   |
| H(23B)-C(23)-H(23C) | 109.5     | O(14)-Eu(1)-O(9)    | 79.41(7)   |
| O(13)-Eu(1)-O(1)    | 103.64(8) | O(4)-Eu(1)-O(9)     | 129.41(7)  |
| O(13)-Eu(1)-O(14)   | 149.25(8) | O(12)-Eu(1)-O(9)    | 147.42(8)  |
| O(1)-Eu(1)-O(14)    | 83.20(8)  | O(8)-Eu(1)-O(9)     | 52.25(7)   |
| O(13)-Eu(1)-O(4)    | 79.06(8)  | O(15)-Eu(1)-O(9)    | 128.06(7)  |
| O(1)-Eu(1)-O(4)     | 151.19(8) | O(3)-N(1)-O(2)      | 122.8(3)   |
| O(14)-Eu(1)-O(4)    | 109.36(7) | O(3)-N(1)-C(3)      | 118.6(3)   |
| O(13)-Eu(1)-O(12)   | 137.64(8) | O(2)-N(1)-C(3)      | 118.6(3)   |
| O(1)-Eu(1)-O(12)    | 83.14(8)  | O(6)-N(2)-O(7)      | 124.0(3)   |
| O(14)-Eu(1)-O(12)   | 72.45(8)  | O(6)-N(2)-C(10)     | 118.3(3)   |
| O(4)-Eu(1)-O(12)    | 76.62(9)  | O(7)-N(2)-C(10)     | 117.8(3)   |
| O(13)-Eu(1)-O(8)    | 79.13(8)  | O(10)-N(3)-O(11)    | 124.4(3)   |
| O(1)-Eu(1)-O(8)     | 127.00(8) | O(10)-N(3)-C(19)    | 117.7(3)   |
| O(14)-Eu(1)-O(8)    | 73.18(8)  | O(11)-N(3)-C(19)    | 118.0(3)   |
| O(4)-Eu(1)-O(8)     | 81.81(7)  | C(7)-O(1)-Eu(1)     | 143.42(19) |
| O(12)-Eu(1)-O(8)    | 129.96(7) | C(14)-O(4)-Eu(1)    | 120.24(19) |
| O(13)-Eu(1)-O(15)   | 72.48(8)  | C(21)-O(8)-Eu(1)    | 94.78(18)  |
| O(1)-Eu(1)-O(15)    | 74.29(8)  | C(21)-O(9)-Eu(1)    | 91.36(17)  |
| O(14)-Eu(1)-O(15)   | 137.38(8) | C(7)#1-O(13)-Eu(1)  | 166.4(2)   |
| O(4)-Eu(1)-O(15)    | 79.45(7)  | C(14)#2-O(14)-Eu(1) | 169.8(2)   |
| O(12)-Eu(1)-O(15)   | 69.33(8)  | C(22)-O(15)-Eu(1)   | 127.34(17) |
| O(8)-Eu(1)-O(15)    | 148.38(7) | C(26)-O(17)-O(17)#3 | 100.8(5)   |
| O(13)-Eu(1)-O(9)    | 73.12(8)  |                     |            |

Symmetry transformations used to generate equivalent atoms:

#1 -x,-y+2,-z+1 #2 -x+1,-y+2,-z+1 #3 -x+1,-y+1,-z+1

Table 3. Bond lengths [ $\text{\AA}$ ] and angles [ $^\circ$ ] for **3**.

|           |          |           |          |
|-----------|----------|-----------|----------|
| C(1)-O(2) | 1.250(5) | C(3)-H(3) | 0.9500   |
| C(1)-O(1) | 1.255(5) | C(4)-C(5) | 1.381(7) |
| C(1)-C(2) | 1.501(6) | C(4)-H(4) | 0.9500   |
| C(2)-C(3) | 1.385(6) | C(5)-C(6) | 1.380(7) |
| C(2)-C(7) | 1.406(6) | C(5)-N(1) | 1.475(6) |
| C(3)-C(4) | 1.395(6) | C(6)-C(7) | 1.386(6) |

|             |          |             |          |
|-------------|----------|-------------|----------|
| C(6)-H(6)   | 0.9500   | C(24)-H(24) | 0.9500   |
| C(7)-H(7)   | 0.9500   | C(25)-C(26) | 1.383(7) |
| C(8)-O(6)   | 1.257(5) | C(25)-H(25) | 0.9500   |
| C(8)-O(5)   | 1.261(5) | C(26)-C(27) | 1.381(7) |
| C(8)-C(9)   | 1.506(6) | C(26)-N(4)  | 1.476(6) |
| C(9)-C(14)  | 1.386(6) | C(27)-C(28) | 1.389(6) |
| C(9)-C(10)  | 1.387(6) | C(27)-H(27) | 0.9500   |
| C(10)-C(11) | 1.385(7) | C(28)-H(28) | 0.9500   |
| C(10)-H(10) | 0.9500   | C(29)-O(17) | 1.251(5) |
| C(11)-C(12) | 1.377(7) | C(29)-O(18) | 1.273(5) |
| C(11)-H(11) | 0.9500   | C(29)-C(30) | 1.495(6) |
| C(12)-C(13) | 1.380(6) | C(30)-C(35) | 1.391(6) |
| C(12)-N(2)  | 1.484(6) | C(30)-C(31) | 1.395(6) |
| C(13)-C(14) | 1.381(6) | C(31)-C(32) | 1.378(6) |
| C(13)-H(13) | 0.9500   | C(31)-H(31) | 0.9500   |
| C(14)-H(14) | 0.9500   | C(32)-C(33) | 1.381(7) |
| C(15)-O(9)  | 1.262(5) | C(32)-H(32) | 0.9500   |
| C(15)-O(10) | 1.266(5) | C(33)-C(34) | 1.382(7) |
| C(15)-C(16) | 1.495(6) | C(33)-N(5)  | 1.473(6) |
| C(16)-C(17) | 1.397(6) | C(34)-C(35) | 1.399(6) |
| C(16)-C(21) | 1.399(6) | C(34)-H(34) | 0.9500   |
| C(17)-C(18) | 1.383(6) | C(35)-H(35) | 0.9500   |
| C(17)-H(17) | 0.9500   | C(36)-O(21) | 1.255(5) |
| C(18)-C(19) | 1.384(6) | C(36)-O(22) | 1.265(5) |
| C(18)-H(18) | 0.9500   | C(36)-C(37) | 1.508(6) |
| C(19)-C(20) | 1.381(7) | C(37)-C(42) | 1.375(6) |
| C(19)-N(3)  | 1.477(6) | C(37)-C(38) | 1.408(6) |
| C(20)-C(21) | 1.386(6) | C(38)-C(39) | 1.371(7) |
| C(20)-H(20) | 0.9500   | C(38)-H(38) | 0.9500   |
| C(21)-H(21) | 0.9500   | C(39)-C(40) | 1.364(8) |
| C(22)-O(14) | 1.253(5) | C(39)-H(39) | 0.9500   |
| C(22)-O(13) | 1.260(5) | C(40)-C(41) | 1.391(7) |
| C(22)-C(23) | 1.503(6) | C(40)-N(6)  | 1.479(6) |
| C(23)-C(28) | 1.392(6) | C(41)-C(42) | 1.396(6) |
| C(23)-C(24) | 1.397(6) | C(41)-H(41) | 0.9500   |
| C(24)-C(25) | 1.390(7) | C(42)-H(42) | 0.9500   |

|                |          |                   |          |
|----------------|----------|-------------------|----------|
| Eu(1)-O(14)#1  | 2.327(3) | C(3)-C(2)-C(1)    | 120.9(4) |
| Eu(1)-O(2)     | 2.353(3) | C(7)-C(2)-C(1)    | 119.3(4) |
| Eu(1)-O(5)     | 2.402(3) | C(2)-C(3)-C(4)    | 120.4(4) |
| Eu(1)-O(21)    | 2.428(3) | C(2)-C(3)-H(3)    | 119.8    |
| Eu(1)-O(17)    | 2.452(3) | C(4)-C(3)-H(3)    | 119.8    |
| Eu(1)-O(27)    | 2.465(3) | C(5)-C(4)-C(3)    | 118.1(4) |
| Eu(1)-O(26)    | 2.490(3) | C(5)-C(4)-H(4)    | 120.9    |
| Eu(1)-O(25)    | 2.506(3) | C(3)-C(4)-H(4)    | 120.9    |
| Eu(1)-O(18)    | 2.709(3) | C(6)-C(5)-C(4)    | 123.3(4) |
| Eu(2)-O(22)    | 2.317(3) | C(6)-C(5)-N(1)    | 117.9(5) |
| Eu(2)-O(13)    | 2.357(3) | C(4)-C(5)-N(1)    | 118.8(4) |
| Eu(2)-O(1)#2   | 2.362(3) | C(5)-C(6)-C(7)    | 117.9(4) |
| Eu(2)-O(18)    | 2.391(3) | C(5)-C(6)-H(6)    | 121.0    |
| Eu(2)-O(6)     | 2.494(3) | C(7)-C(6)-H(6)    | 121.0    |
| Eu(2)-O(28)    | 2.509(3) | C(6)-C(7)-C(2)    | 120.5(4) |
| Eu(2)-O(9)     | 2.535(3) | C(6)-C(7)-H(7)    | 119.7    |
| Eu(2)-O(10)    | 2.548(3) | C(2)-C(7)-H(7)    | 119.7    |
| Eu(2)-O(5)     | 2.719(3) | O(6)-C(8)-O(5)    | 121.4(4) |
| N(1)-O(3)      | 1.219(6) | O(6)-C(8)-C(9)    | 118.3(4) |
| N(1)-O(4)      | 1.220(6) | O(5)-C(8)-C(9)    | 120.0(4) |
| N(2)-O(8)      | 1.216(6) | C(14)-C(9)-C(10)  | 120.0(4) |
| N(2)-O(7)      | 1.218(5) | C(14)-C(9)-C(8)   | 121.2(4) |
| N(3)-O(11)     | 1.217(5) | C(10)-C(9)-C(8)   | 118.6(4) |
| N(3)-O(12)     | 1.233(5) | C(11)-C(10)-C(9)  | 120.0(4) |
| N(4)-O(15)     | 1.215(6) | C(11)-C(10)-H(10) | 120.0    |
| N(4)-O(16)     | 1.232(6) | C(9)-C(10)-H(10)  | 120.0    |
| N(5)-O(20)     | 1.218(6) | C(12)-C(11)-C(10) | 118.7(4) |
| N(5)-O(19)     | 1.235(6) | C(12)-C(11)-H(11) | 120.6    |
| N(6)-O(24)     | 1.231(7) | C(10)-C(11)-H(11) | 120.6    |
| N(6)-O(23)     | 1.232(7) | C(11)-C(12)-C(13) | 122.4(4) |
| O(1)-Eu(2)#1   | 2.362(3) | C(11)-C(12)-N(2)  | 117.8(4) |
| O(14)-Eu(1)#2  | 2.327(3) | C(13)-C(12)-N(2)  | 119.8(4) |
| O(2)-C(1)-O(1) | 124.7(4) | C(12)-C(13)-C(14) | 118.3(4) |
| O(2)-C(1)-C(2) | 117.7(4) | C(12)-C(13)-H(13) | 120.9    |
| O(1)-C(1)-C(2) | 117.7(4) | C(14)-C(13)-H(13) | 120.9    |
| C(3)-C(2)-C(7) | 119.7(4) | C(13)-C(14)-C(9)  | 120.6(4) |

|                   |          |                   |          |
|-------------------|----------|-------------------|----------|
| C(13)-C(14)-H(14) | 119.7    | C(27)-C(26)-N(4)  | 118.3(5) |
| C(9)-C(14)-H(14)  | 119.7    | C(25)-C(26)-N(4)  | 118.2(4) |
| O(9)-C(15)-O(10)  | 120.8(4) | C(26)-C(27)-C(28) | 117.5(4) |
| O(9)-C(15)-C(16)  | 119.1(4) | C(26)-C(27)-H(27) | 121.2    |
| O(10)-C(15)-C(16) | 120.0(4) | C(28)-C(27)-H(27) | 121.2    |
| C(17)-C(16)-C(21) | 120.0(4) | C(27)-C(28)-C(23) | 120.8(4) |
| C(17)-C(16)-C(15) | 119.7(4) | C(27)-C(28)-H(28) | 119.6    |
| C(21)-C(16)-C(15) | 120.2(4) | C(23)-C(28)-H(28) | 119.6    |
| C(18)-C(17)-C(16) | 120.4(4) | O(17)-C(29)-O(18) | 121.8(4) |
| C(18)-C(17)-H(17) | 119.8    | O(17)-C(29)-C(30) | 118.8(4) |
| C(16)-C(17)-H(17) | 119.8    | O(18)-C(29)-C(30) | 119.4(3) |
| C(19)-C(18)-C(17) | 117.7(4) | C(35)-C(30)-C(31) | 120.3(4) |
| C(19)-C(18)-H(18) | 121.2    | C(35)-C(30)-C(29) | 119.4(4) |
| C(17)-C(18)-H(18) | 121.2    | C(31)-C(30)-C(29) | 120.2(4) |
| C(20)-C(19)-C(18) | 123.8(4) | C(32)-C(31)-C(30) | 120.5(4) |
| C(20)-C(19)-N(3)  | 118.3(4) | C(32)-C(31)-H(31) | 119.7    |
| C(18)-C(19)-N(3)  | 117.9(4) | C(30)-C(31)-H(31) | 119.7    |
| C(19)-C(20)-C(21) | 117.8(4) | C(31)-C(32)-C(33) | 117.8(4) |
| C(19)-C(20)-H(20) | 121.1    | C(31)-C(32)-H(32) | 121.1    |
| C(21)-C(20)-H(20) | 121.1    | C(33)-C(32)-H(32) | 121.1    |
| C(20)-C(21)-C(16) | 120.2(4) | C(32)-C(33)-C(34) | 123.7(4) |
| C(20)-C(21)-H(21) | 119.9    | C(32)-C(33)-N(5)  | 117.7(4) |
| C(16)-C(21)-H(21) | 119.9    | C(34)-C(33)-N(5)  | 118.5(4) |
| O(14)-C(22)-O(13) | 124.2(4) | C(33)-C(34)-C(35) | 117.5(4) |
| O(14)-C(22)-C(23) | 118.7(4) | C(33)-C(34)-H(34) | 121.2    |
| O(13)-C(22)-C(23) | 117.1(4) | C(35)-C(34)-H(34) | 121.2    |
| C(28)-C(23)-C(24) | 120.0(4) | C(30)-C(35)-C(34) | 119.9(4) |
| C(28)-C(23)-C(22) | 120.6(4) | C(30)-C(35)-H(35) | 120.1    |
| C(24)-C(23)-C(22) | 119.3(4) | C(34)-C(35)-H(35) | 120.1    |
| C(25)-C(24)-C(23) | 120.0(4) | O(21)-C(36)-O(22) | 125.6(4) |
| C(25)-C(24)-H(24) | 120.0    | O(21)-C(36)-C(37) | 118.2(4) |
| C(23)-C(24)-H(24) | 120.0    | O(22)-C(36)-C(37) | 116.2(4) |
| C(26)-C(25)-C(24) | 118.1(4) | C(42)-C(37)-C(38) | 119.9(4) |
| C(26)-C(25)-H(25) | 120.9    | C(42)-C(37)-C(36) | 121.2(4) |
| C(24)-C(25)-H(25) | 120.9    | C(38)-C(37)-C(36) | 118.9(4) |
| C(27)-C(26)-C(25) | 123.5(4) | C(39)-C(38)-C(37) | 119.7(5) |

|                     |            |                     |            |
|---------------------|------------|---------------------|------------|
| C(39)-C(38)-H(38)   | 120.1      | O(2)-Eu(1)-O(25)    | 73.02(11)  |
| C(37)-C(38)-H(38)   | 120.1      | O(5)-Eu(1)-O(25)    | 76.56(10)  |
| C(40)-C(39)-C(38)   | 119.2(5)   | O(21)-Eu(1)-O(25)   | 71.15(10)  |
| C(40)-C(39)-H(39)   | 120.4      | O(17)-Eu(1)-O(25)   | 141.48(10) |
| C(38)-C(39)-H(39)   | 120.4      | O(27)-Eu(1)-O(25)   | 134.40(10) |
| C(39)-C(40)-C(41)   | 123.1(5)   | O(26)-Eu(1)-O(25)   | 127.44(10) |
| C(39)-C(40)-N(6)    | 119.5(5)   | O(14)#1-Eu(1)-O(18) | 130.05(10) |
| C(41)-C(40)-N(6)    | 117.3(5)   | O(2)-Eu(1)-O(18)    | 135.58(10) |
| C(40)-C(41)-C(42)   | 117.1(5)   | O(5)-Eu(1)-O(18)    | 68.41(10)  |
| C(40)-C(41)-H(41)   | 121.4      | O(21)-Eu(1)-O(18)   | 69.44(10)  |
| C(42)-C(41)-H(41)   | 121.4      | O(17)-Eu(1)-O(18)   | 50.30(9)   |
| C(37)-C(42)-C(41)   | 120.8(4)   | O(27)-Eu(1)-O(18)   | 66.44(10)  |
| C(37)-C(42)-H(42)   | 119.6      | O(26)-Eu(1)-O(18)   | 105.32(9)  |
| C(41)-C(42)-H(42)   | 119.6      | O(25)-Eu(1)-O(18)   | 127.09(10) |
| O(14)#1-Eu(1)-O(2)  | 92.45(11)  | O(22)-Eu(2)-O(13)   | 80.47(11)  |
| O(14)#1-Eu(1)-O(5)  | 147.29(11) | O(22)-Eu(2)-O(1)#2  | 135.00(11) |
| O(2)-Eu(1)-O(5)     | 82.16(11)  | O(13)-Eu(2)-O(1)#2  | 104.49(11) |
| O(14)#1-Eu(1)-O(21) | 77.38(10)  | O(22)-Eu(2)-O(18)   | 75.80(11)  |
| O(2)-Eu(1)-O(21)    | 144.15(10) | O(13)-Eu(2)-O(18)   | 79.52(10)  |
| O(5)-Eu(1)-O(21)    | 88.23(10)  | O(1)#2-Eu(2)-O(18)  | 149.13(11) |
| O(14)#1-Eu(1)-O(17) | 85.70(11)  | O(22)-Eu(2)-O(6)    | 87.11(11)  |
| O(2)-Eu(1)-O(17)    | 140.11(11) | O(13)-Eu(2)-O(6)    | 155.42(10) |
| O(5)-Eu(1)-O(17)    | 118.67(10) | O(1)#2-Eu(2)-O(6)   | 70.00(11)  |
| O(21)-Eu(1)-O(17)   | 74.11(11)  | O(18)-Eu(2)-O(6)    | 117.96(10) |
| O(14)#1-Eu(1)-O(27) | 139.06(11) | O(22)-Eu(2)-O(28)   | 71.47(10)  |
| O(2)-Eu(1)-O(27)    | 72.63(10)  | O(13)-Eu(2)-O(28)   | 76.38(11)  |
| O(5)-Eu(1)-O(27)    | 69.86(10)  | O(1)#2-Eu(2)-O(28)  | 66.69(11)  |
| O(21)-Eu(1)-O(27)   | 135.37(10) | O(18)-Eu(2)-O(28)   | 141.91(10) |
| O(17)-Eu(1)-O(27)   | 82.94(10)  | O(6)-Eu(2)-O(28)    | 79.59(10)  |
| O(14)#1-Eu(1)-O(26) | 72.49(11)  | O(22)-Eu(2)-O(9)    | 136.23(10) |
| O(2)-Eu(1)-O(26)    | 72.12(11)  | O(13)-Eu(2)-O(9)    | 122.81(10) |
| O(5)-Eu(1)-O(26)    | 134.27(10) | O(1)#2-Eu(2)-O(9)   | 78.97(10)  |
| O(21)-Eu(1)-O(26)   | 133.67(11) | O(18)-Eu(2)-O(9)    | 73.59(10)  |
| O(17)-Eu(1)-O(26)   | 69.36(10)  | O(6)-Eu(2)-O(9)     | 80.50(10)  |
| O(27)-Eu(1)-O(26)   | 66.68(10)  | O(28)-Eu(2)-O(9)    | 144.50(10) |
| O(14)#1-Eu(1)-O(25) | 71.03(11)  | O(22)-Eu(2)-O(10)   | 148.69(10) |

|                    |            |                     |            |
|--------------------|------------|---------------------|------------|
| O(13)-Eu(2)-O(10)  | 75.35(10)  | Eu(1)-O(5)-Eu(2)    | 109.08(11) |
| O(1)#2-Eu(2)-O(10) | 71.35(11)  | C(8)-O(6)-Eu(2)     | 95.5(3)    |
| O(18)-Eu(2)-O(10)  | 80.44(10)  | C(15)-O(9)-Eu(2)    | 94.1(2)    |
| O(6)-Eu(2)-O(10)   | 122.38(10) | C(15)-O(10)-Eu(2)   | 93.4(3)    |
| O(28)-Eu(2)-O(10)  | 120.39(9)  | C(22)-O(13)-Eu(2)   | 133.0(3)   |
| O(9)-Eu(2)-O(10)   | 51.24(9)   | C(22)-O(14)-Eu(1)#2 | 154.3(3)   |
| O(22)-Eu(2)-O(5)   | 74.55(10)  | C(29)-O(17)-Eu(1)   | 100.3(3)   |
| O(13)-Eu(2)-O(5)   | 143.09(10) | C(29)-O(18)-Eu(2)   | 157.7(3)   |
| O(1)#2-Eu(2)-O(5)  | 112.40(10) | C(29)-O(18)-Eu(1)   | 87.6(2)    |
| O(18)-Eu(2)-O(5)   | 68.38(10)  | Eu(2)-O(18)-Eu(1)   | 109.77(11) |
| O(6)-Eu(2)-O(5)    | 49.58(9)   | C(36)-O(21)-Eu(1)   | 132.6(3)   |
| O(28)-Eu(2)-O(5)   | 119.14(10) | C(36)-O(22)-Eu(2)   | 137.4(3)   |
| O(9)-Eu(2)-O(5)    | 65.47(9)   |                     |            |
| O(10)-Eu(2)-O(5)   | 114.98(9)  |                     |            |
| O(3)-N(1)-O(4)     | 124.8(4)   |                     |            |
| O(3)-N(1)-C(5)     | 117.8(5)   |                     |            |
| O(4)-N(1)-C(5)     | 117.4(4)   |                     |            |
| O(8)-N(2)-O(7)     | 124.2(4)   |                     |            |
| O(8)-N(2)-C(12)    | 117.8(4)   |                     |            |
| O(7)-N(2)-C(12)    | 118.0(4)   |                     |            |
| O(11)-N(3)-O(12)   | 123.5(4)   |                     |            |
| O(11)-N(3)-C(19)   | 119.2(4)   |                     |            |
| O(12)-N(3)-C(19)   | 117.3(4)   |                     |            |
| O(15)-N(4)-O(16)   | 123.5(5)   |                     |            |
| O(15)-N(4)-C(26)   | 118.7(5)   |                     |            |
| O(16)-N(4)-C(26)   | 117.7(5)   |                     |            |
| O(20)-N(5)-O(19)   | 123.6(4)   |                     |            |
| O(20)-N(5)-C(33)   | 118.8(4)   |                     |            |
| O(19)-N(5)-C(33)   | 117.5(4)   |                     |            |
| O(24)-N(6)-O(23)   | 124.1(5)   |                     |            |
| O(24)-N(6)-C(40)   | 117.5(5)   |                     |            |
| O(23)-N(6)-C(40)   | 118.4(5)   |                     |            |
| C(1)-O(1)-Eu(2)#1  | 142.0(3)   |                     |            |
| C(1)-O(2)-Eu(1)    | 144.8(3)   |                     |            |
| C(8)-O(5)-Eu(1)    | 165.7(3)   |                     |            |
| C(8)-O(5)-Eu(2)    | 85.2(2)    |                     |            |

---

Symmetry transformations used to generate equivalent atoms:

#1  $x-1,y,z$  #2  $x+1,y,z$

Table 4. Bond lengths [ $\text{\AA}$ ] and angles [ $^\circ$ ] for **4**.

---

|             |          |             |          |
|-------------|----------|-------------|----------|
| C(1)-O(2)   | 1.264(4) | C(15)-C(16) | 1.502(4) |
| C(1)-O(1)   | 1.264(4) | C(16)-C(21) | 1.394(5) |
| C(1)-C(2)   | 1.501(5) | C(16)-C(17) | 1.401(5) |
| C(2)-C(7)   | 1.390(5) | C(17)-C(18) | 1.381(5) |
| C(2)-C(3)   | 1.394(5) | C(17)-H(17) | 0.9500   |
| C(3)-C(4)   | 1.387(5) | C(18)-C(19) | 1.382(5) |
| C(3)-H(3)   | 0.9500   | C(18)-H(18) | 0.9500   |
| C(4)-C(5)   | 1.388(5) | C(19)-C(20) | 1.381(6) |
| C(4)-H(4)   | 0.9500   | C(19)-N(3)  | 1.482(5) |
| C(5)-C(6)   | 1.380(5) | C(20)-C(21) | 1.390(5) |
| C(5)-N(1)   | 1.470(4) | C(20)-H(20) | 0.9500   |
| C(6)-C(7)   | 1.386(5) | C(21)-H(21) | 0.9500   |
| C(6)-H(6)   | 0.9500   | C(22)-O(14) | 1.251(4) |
| C(7)-H(7)   | 0.9500   | C(22)-O(13) | 1.259(4) |
| C(8)-O(6)   | 1.256(4) | C(22)-C(23) | 1.507(4) |
| C(8)-O(5)   | 1.257(4) | C(23)-C(24) | 1.385(5) |
| C(8)-C(9)   | 1.505(4) | C(23)-C(28) | 1.392(5) |
| C(9)-C(14)  | 1.380(5) | C(24)-C(25) | 1.383(5) |
| C(9)-C(10)  | 1.385(5) | C(24)-H(24) | 0.9500   |
| C(10)-C(11) | 1.389(5) | C(25)-C(26) | 1.391(6) |
| C(10)-H(10) | 0.9500   | C(25)-H(25) | 0.9500   |
| C(11)-C(12) | 1.381(6) | C(26)-C(27) | 1.385(6) |
| C(11)-H(11) | 0.9500   | C(26)-N(4)  | 1.475(5) |
| C(12)-C(13) | 1.365(6) | C(27)-C(28) | 1.377(5) |
| C(12)-N(2)  | 1.479(4) | C(27)-H(27) | 0.9500   |
| C(13)-C(14) | 1.391(5) | C(28)-H(28) | 0.9500   |
| C(13)-H(13) | 0.9500   | C(29)-O(18) | 1.256(4) |
| C(14)-H(14) | 0.9500   | C(29)-O(17) | 1.266(4) |
| C(15)-O(9)  | 1.251(4) | C(29)-C(30) | 1.496(4) |
| C(15)-O(10) | 1.254(4) | C(30)-C(31) | 1.392(5) |



|             |          |                |          |
|-------------|----------|----------------|----------|
| C(30)-C(35) | 1.395(5) | O(1)-Tb(1)     | 2.523(2) |
| C(31)-C(32) | 1.390(5) | O(2)-Tb(1)     | 2.507(2) |
| C(31)-H(31) | 0.9500   | O(5)-Tb(1)     | 2.428(2) |
| C(32)-C(33) | 1.386(6) | O(6)-Tb(2)     | 2.349(2) |
| C(32)-H(32) | 0.9500   | O(6)-Tb(1)     | 2.893(3) |
| C(33)-C(34) | 1.381(6) | O(9)-Tb(2)     | 2.318(2) |
| C(33)-N(5)  | 1.471(5) | O(10)-Tb(1)#1  | 2.323(2) |
| C(34)-C(35) | 1.383(5) | O(13)-Tb(1)    | 2.283(2) |
| C(34)-H(34) | 0.9500   | O(14)-Tb(2)    | 2.403(2) |
| C(35)-H(35) | 0.9500   | O(17)-Tb(1)    | 2.352(2) |
| C(36)-O(21) | 1.256(4) | O(17)-Tb(2)    | 2.778(2) |
| C(36)-O(22) | 1.263(4) | O(18)-Tb(2)    | 2.405(2) |
| C(36)-C(37) | 1.506(4) | O(21)-Tb(2)#2  | 2.299(2) |
| C(37)-C(38) | 1.389(5) | O(22)-Tb(1)    | 2.319(2) |
| C(37)-C(42) | 1.390(5) | O(25)-Tb(1)    | 2.464(2) |
| C(38)-C(39) | 1.381(5) | O(26)-Tb(2)    | 2.432(2) |
| C(38)-H(38) | 0.9500   | O(27)-Tb(2)    | 2.482(2) |
| C(39)-C(40) | 1.387(5) | O(28)-Tb(2)    | 2.472(2) |
| C(39)-H(39) | 0.9500   | Tb(1)-O(10)#2  | 2.323(2) |
| C(40)-C(41) | 1.382(6) | Tb(2)-O(21)#1  | 2.299(2) |
| C(40)-N(6)  | 1.477(5) | O(2)-C(1)-O(1) | 121.2(3) |
| C(41)-C(42) | 1.388(5) | O(2)-C(1)-C(2) | 119.4(3) |
| C(41)-H(41) | 0.9500   | O(1)-C(1)-C(2) | 119.4(3) |
| C(42)-H(42) | 0.9500   | C(7)-C(2)-C(3) | 120.0(3) |
| N(1)-O(4)   | 1.226(4) | C(7)-C(2)-C(1) | 119.9(3) |
| N(1)-O(3)   | 1.231(4) | C(3)-C(2)-C(1) | 120.0(3) |
| N(2)-O(7)   | 1.210(5) | C(4)-C(3)-C(2) | 120.4(3) |
| N(2)-O(8)   | 1.229(5) | C(4)-C(3)-H(3) | 119.8    |
| N(3)-O(11)  | 1.215(5) | C(2)-C(3)-H(3) | 119.8    |
| N(3)-O(12)  | 1.217(5) | C(3)-C(4)-C(5) | 117.7(3) |
| N(4)-O(16)  | 1.224(5) | C(3)-C(4)-H(4) | 121.2    |
| N(4)-O(15)  | 1.234(6) | C(5)-C(4)-H(4) | 121.2    |
| N(5)-O(19)  | 1.224(5) | C(6)-C(5)-C(4) | 123.4(3) |
| N(5)-O(20)  | 1.229(5) | C(6)-C(5)-N(1) | 118.6(3) |
| N(6)-O(24)  | 1.214(5) | C(4)-C(5)-N(1) | 118.0(3) |
| N(6)-O(23)  | 1.232(5) | C(5)-C(6)-C(7) | 117.8(3) |

|                   |          |                   |          |
|-------------------|----------|-------------------|----------|
| C(5)-C(6)-H(6)    | 121.1    | C(17)-C(18)-H(18) | 121.1    |
| C(7)-C(6)-H(6)    | 121.1    | C(19)-C(18)-H(18) | 121.1    |
| C(6)-C(7)-C(2)    | 120.7(3) | C(20)-C(19)-C(18) | 123.5(3) |
| C(6)-C(7)-H(7)    | 119.7    | C(20)-C(19)-N(3)  | 119.0(4) |
| C(2)-C(7)-H(7)    | 119.7    | C(18)-C(19)-N(3)  | 117.5(4) |
| O(6)-C(8)-O(5)    | 121.6(3) | C(19)-C(20)-C(21) | 118.2(3) |
| O(6)-C(8)-C(9)    | 119.9(3) | C(19)-C(20)-H(20) | 120.9    |
| O(5)-C(8)-C(9)    | 118.2(3) | C(21)-C(20)-H(20) | 120.9    |
| C(14)-C(9)-C(10)  | 120.2(3) | C(20)-C(21)-C(16) | 119.8(3) |
| C(14)-C(9)-C(8)   | 118.5(3) | C(20)-C(21)-H(21) | 120.1    |
| C(10)-C(9)-C(8)   | 121.1(3) | C(16)-C(21)-H(21) | 120.1    |
| C(9)-C(10)-C(11)  | 120.3(3) | O(14)-C(22)-O(13) | 125.5(3) |
| C(9)-C(10)-H(10)  | 119.9    | O(14)-C(22)-C(23) | 118.6(3) |
| C(11)-C(10)-H(10) | 119.9    | O(13)-C(22)-C(23) | 115.8(3) |
| C(12)-C(11)-C(10) | 118.2(3) | C(24)-C(23)-C(28) | 120.1(3) |
| C(12)-C(11)-H(11) | 120.9    | C(24)-C(23)-C(22) | 120.9(3) |
| C(10)-C(11)-H(11) | 120.9    | C(28)-C(23)-C(22) | 119.0(3) |
| C(13)-C(12)-C(11) | 122.5(3) | C(25)-C(24)-C(23) | 120.3(4) |
| C(13)-C(12)-N(2)  | 118.6(3) | C(25)-C(24)-H(24) | 119.8    |
| C(11)-C(12)-N(2)  | 118.9(3) | C(23)-C(24)-H(24) | 119.8    |
| C(12)-C(13)-C(14) | 118.8(4) | C(24)-C(25)-C(26) | 118.0(4) |
| C(12)-C(13)-H(13) | 120.6    | C(24)-C(25)-H(25) | 121.0    |
| C(14)-C(13)-H(13) | 120.6    | C(26)-C(25)-H(25) | 121.0    |
| C(9)-C(14)-C(13)  | 120.0(4) | C(27)-C(26)-C(25) | 122.9(3) |
| C(9)-C(14)-H(14)  | 120.0    | C(27)-C(26)-N(4)  | 118.6(4) |
| C(13)-C(14)-H(14) | 120.0    | C(25)-C(26)-N(4)  | 118.5(4) |
| O(9)-C(15)-O(10)  | 124.8(3) | C(28)-C(27)-C(26) | 117.8(4) |
| O(9)-C(15)-C(16)  | 116.9(3) | C(28)-C(27)-H(27) | 121.1    |
| O(10)-C(15)-C(16) | 118.3(3) | C(26)-C(27)-H(27) | 121.1    |
| C(21)-C(16)-C(17) | 120.2(3) | C(27)-C(28)-C(23) | 120.8(4) |
| C(21)-C(16)-C(15) | 120.2(3) | C(27)-C(28)-H(28) | 119.6    |
| C(17)-C(16)-C(15) | 119.5(3) | C(23)-C(28)-H(28) | 119.6    |
| C(18)-C(17)-C(16) | 120.5(3) | O(18)-C(29)-O(17) | 121.5(3) |
| C(18)-C(17)-H(17) | 119.8    | O(18)-C(29)-C(30) | 118.9(3) |
| C(16)-C(17)-H(17) | 119.8    | O(17)-C(29)-C(30) | 119.5(3) |
| C(17)-C(18)-C(19) | 117.8(3) | C(31)-C(30)-C(35) | 120.7(3) |

|                   |          |                     |           |
|-------------------|----------|---------------------|-----------|
| C(31)-C(30)-C(29) | 119.6(3) | C(41)-C(42)-H(42)   | 119.9     |
| C(35)-C(30)-C(29) | 119.7(3) | C(37)-C(42)-H(42)   | 119.9     |
| C(32)-C(31)-C(30) | 120.0(3) | O(4)-N(1)-O(3)      | 123.4(3)  |
| C(32)-C(31)-H(31) | 120.0    | O(4)-N(1)-C(5)      | 118.7(3)  |
| C(30)-C(31)-H(31) | 120.0    | O(3)-N(1)-C(5)      | 117.9(3)  |
| C(33)-C(32)-C(31) | 118.0(3) | O(7)-N(2)-O(8)      | 124.1(3)  |
| C(33)-C(32)-H(32) | 121.0    | O(7)-N(2)-C(12)     | 119.0(3)  |
| C(31)-C(32)-H(32) | 121.0    | O(8)-N(2)-C(12)     | 116.9(3)  |
| C(34)-C(33)-C(32) | 123.0(3) | O(11)-N(3)-O(12)    | 124.8(4)  |
| C(34)-C(33)-N(5)  | 117.8(4) | O(11)-N(3)-C(19)    | 117.7(4)  |
| C(32)-C(33)-N(5)  | 119.2(4) | O(12)-N(3)-C(19)    | 117.5(4)  |
| C(33)-C(34)-C(35) | 118.6(4) | O(16)-N(4)-O(15)    | 124.4(4)  |
| C(33)-C(34)-H(34) | 120.7    | O(16)-N(4)-C(26)    | 117.6(4)  |
| C(35)-C(34)-H(34) | 120.7    | O(15)-N(4)-C(26)    | 118.0(4)  |
| C(34)-C(35)-C(30) | 119.7(3) | O(19)-N(5)-O(20)    | 124.3(4)  |
| C(34)-C(35)-H(35) | 120.2    | O(19)-N(5)-C(33)    | 118.9(4)  |
| C(30)-C(35)-H(35) | 120.2    | O(20)-N(5)-C(33)    | 116.8(4)  |
| O(21)-C(36)-O(22) | 123.9(3) | O(24)-N(6)-O(23)    | 123.8(4)  |
| O(21)-C(36)-C(37) | 118.3(3) | O(24)-N(6)-C(40)    | 118.8(4)  |
| O(22)-C(36)-C(37) | 117.8(3) | O(23)-N(6)-C(40)    | 117.4(4)  |
| C(38)-C(37)-C(42) | 120.5(3) | C(1)-O(1)-Tb(1)     | 92.74(19) |
| C(38)-C(37)-C(36) | 120.1(3) | C(1)-O(2)-Tb(1)     | 93.51(19) |
| C(42)-C(37)-C(36) | 119.4(3) | C(8)-O(5)-Tb(1)     | 101.5(2)  |
| C(39)-C(38)-C(37) | 120.3(3) | C(8)-O(6)-Tb(2)     | 172.4(2)  |
| C(39)-C(38)-H(38) | 119.9    | C(8)-O(6)-Tb(1)     | 80.07(18) |
| C(37)-C(38)-H(38) | 119.9    | Tb(2)-O(6)-Tb(1)    | 107.29(9) |
| C(38)-C(39)-C(40) | 117.9(3) | C(15)-O(9)-Tb(2)    | 144.6(2)  |
| C(38)-C(39)-H(39) | 121.1    | C(15)-O(10)-Tb(1)#1 | 144.4(2)  |
| C(40)-C(39)-H(39) | 121.1    | C(22)-O(13)-Tb(1)   | 139.7(2)  |
| C(41)-C(40)-C(39) | 123.4(3) | C(22)-O(14)-Tb(2)   | 134.5(2)  |
| C(41)-C(40)-N(6)  | 118.3(4) | C(29)-O(17)-Tb(1)   | 157.8(2)  |
| C(39)-C(40)-N(6)  | 118.3(4) | C(29)-O(17)-Tb(2)   | 85.45(18) |
| C(40)-C(41)-C(42) | 117.7(3) | Tb(1)-O(17)-Tb(2)   | 110.96(9) |
| C(40)-C(41)-H(41) | 121.2    | C(29)-O(18)-Tb(2)   | 103.4(2)  |
| C(42)-C(41)-H(41) | 121.2    | C(36)-O(21)-Tb(2)#2 | 155.9(2)  |
| C(41)-C(42)-C(37) | 120.2(3) | C(36)-O(22)-Tb(1)   | 135.7(2)  |

|                     |           |                     |           |
|---------------------|-----------|---------------------|-----------|
| O(13)-Tb(1)-O(22)   | 81.05(9)  | O(21)#1-Tb(2)-O(9)  | 94.11(8)  |
| O(13)-Tb(1)-O(10)#2 | 136.13(9) | O(21)#1-Tb(2)-O(6)  | 146.83(9) |
| O(22)-Tb(1)-O(10)#2 | 103.78(9) | O(9)-Tb(2)-O(6)     | 80.89(9)  |
| O(13)-Tb(1)-O(17)   | 75.07(8)  | O(21)#1-Tb(2)-O(14) | 77.95(8)  |
| O(22)-Tb(1)-O(17)   | 81.49(8)  | O(9)-Tb(2)-O(14)    | 144.44(8) |
| O(10)#2-Tb(1)-O(17) | 148.61(8) | O(6)-Tb(2)-O(14)    | 87.22(8)  |
| O(13)-Tb(1)-O(5)    | 86.56(8)  | O(21)#1-Tb(2)-O(18) | 84.84(8)  |
| O(22)-Tb(1)-O(5)    | 155.53(8) | O(9)-Tb(2)-O(18)    | 140.18(9) |
| O(10)#2-Tb(1)-O(5)  | 71.28(9)  | O(6)-Tb(2)-O(18)    | 119.65(8) |
| O(17)-Tb(1)-O(5)    | 115.62(8) | O(14)-Tb(2)-O(18)   | 74.28(9)  |
| O(13)-Tb(1)-O(25)   | 71.91(8)  | O(21)#1-Tb(2)-O(26) | 139.70(9) |
| O(22)-Tb(1)-O(25)   | 77.77(9)  | O(9)-Tb(2)-O(26)    | 72.85(8)  |
| O(10)#2-Tb(1)-O(25) | 66.88(8)  | O(6)-Tb(2)-O(26)    | 70.19(8)  |
| O(17)-Tb(1)-O(25)   | 143.18(8) | O(14)-Tb(2)-O(26)   | 133.57(8) |
| O(5)-Tb(1)-O(25)    | 78.35(8)  | O(18)-Tb(2)-O(26)   | 82.45(8)  |
| O(13)-Tb(1)-O(2)    | 134.96(8) | O(21)#1-Tb(2)-O(28) | 72.85(9)  |
| O(22)-Tb(1)-O(2)    | 124.28(8) | O(9)-Tb(2)-O(28)    | 71.44(9)  |
| O(10)#2-Tb(1)-O(2)  | 78.40(8)  | O(6)-Tb(2)-O(28)    | 133.93(8) |
| O(17)-Tb(1)-O(2)    | 73.45(8)  | O(14)-Tb(2)-O(28)   | 135.43(8) |
| O(5)-Tb(1)-O(2)     | 79.02(8)  | O(18)-Tb(2)-O(28)   | 70.28(8)  |
| O(25)-Tb(1)-O(2)    | 143.09(8) | O(26)-Tb(2)-O(28)   | 66.85(8)  |
| O(13)-Tb(1)-O(1)    | 147.76(8) | O(21)#1-Tb(2)-O(27) | 70.50(9)  |
| O(22)-Tb(1)-O(1)    | 75.41(8)  | O(9)-Tb(2)-O(27)    | 73.02(9)  |
| O(10)#2-Tb(1)-O(1)  | 71.88(9)  | O(6)-Tb(2)-O(27)    | 76.72(9)  |
| O(17)-Tb(1)-O(1)    | 79.88(8)  | O(14)-Tb(2)-O(27)   | 71.65(8)  |
| O(5)-Tb(1)-O(1)     | 122.96(8) | O(18)-Tb(2)-O(27)   | 141.22(8) |
| O(25)-Tb(1)-O(1)    | 122.73(8) | O(26)-Tb(2)-O(27)   | 135.34(8) |
| O(2)-Tb(1)-O(1)     | 51.93(8)  | O(28)-Tb(2)-O(27)   | 125.91(8) |
| O(13)-Tb(1)-O(6)    | 72.79(8)  | O(21)#1-Tb(2)-O(17) | 128.61(8) |
| O(22)-Tb(1)-O(6)    | 143.71(7) | O(9)-Tb(2)-O(17)    | 135.17(8) |
| O(10)#2-Tb(1)-O(6)  | 112.51(8) | O(6)-Tb(2)-O(17)    | 70.06(8)  |
| O(17)-Tb(1)-O(6)    | 67.91(7)  | O(14)-Tb(2)-O(17)   | 68.69(8)  |
| O(5)-Tb(1)-O(6)     | 47.73(7)  | O(18)-Tb(2)-O(17)   | 49.62(7)  |
| O(25)-Tb(1)-O(6)    | 115.80(8) | O(26)-Tb(2)-O(17)   | 65.61(8)  |
| O(2)-Tb(1)-O(6)     | 65.94(7)  | O(28)-Tb(2)-O(17)   | 105.32(7) |
| O(1)-Tb(1)-O(6)     | 115.78(8) | O(27)-Tb(2)-O(17)   | 128.59(8) |

---

Symmetry transformations used to generate equivalent atoms:

#1  $x+1,y,z$  #2  $x-1,y,z$

Table 5. NMR titration data (chemical shifts in ppm) for 2-nitrobenzoic acid and Eu(III) in 90% methanol/10% water (v/v). Initial concentrations were  $[L]=0.1266$  M,  $[Eu(III)]=0.0127$  M at  $I=0.1$  M (KCl).

| <b>Spectrum</b> | <b>A</b> | <b>B</b> | <b>C</b> | <b>D</b> | <b>E</b> | <b>F</b> | <b>G</b> | <b>H</b> | <b>I</b> | <b>J</b> |
|-----------------|----------|----------|----------|----------|----------|----------|----------|----------|----------|----------|
| H1              | 5.332    | 5.335    | 5.337    | 5.359    | 5.384    | 5.404    | 5.432    | 5.458    | 5.496    | 5.5317   |
| H2              | 6.731    | 6.732    | 6.736    | 6.742    | 6.75     | 6.757    | 6.765    | 6.773    | 6.785    | 6.798    |
| H3              | 6.793    | 6.795    | 6.799    | 6.807    | 6.816    | 6.826    | 6.836    | 6.847    | 6.862    | 6.879    |
| H4              | 6.992    | 6.99     | 6.991    | 6.995    | 6.999    | 7.004    | 7.009    | 7.013    | 7.02     | 7.027    |

Table 6. NMR titration data (chemical shifts in ppm) for 3-nitrobenzoic acid and Eu(III) in 90% methanol/10% water (v/v). Initial concentrations were  $[L]=0.1008$  M,  $[Eu(III)]=0.0424$  M at  $I=0.1$  M (KCl).

| <b>Spectrum</b> | <b>A</b> | <b>B</b> | <b>C</b> | <b>D</b> | <b>F</b> | <b>G</b> | <b>H</b> | <b>I</b> | <b>J</b> | <b>K</b> |
|-----------------|----------|----------|----------|----------|----------|----------|----------|----------|----------|----------|
| H1              | 5.2117   | 5.2427   | 5.2551   | 5.2577   | 5.2644   | 5.2697   | 5.2762   | 5.2873   | 5.3039   | 5.3331   |
| H2              | 5.548    | 5.5703   | 5.5828   | 5.5838   | 5.5809   | 5.5801   | 5.5782   | 5.585    | 5.5937   | 5.6145   |
| H3              | 6.4084   | 5.4182   | 6.4217   | 6.404    | 6.4026   | 6.3995   | 6.3966   | 6.3946   | 6.3937   | 6.3948   |
| H4              | 7.4034   | 7.4091   | 7.4099   | 7.405    | 7.4018   | 7.3968   | 7.3919   | 7.3869   | 7.3817   | 7.3794   |

Table 7. NMR titration data (chemical shifts in ppm) for 2-nitrobenzoic acid and Eu(III) in methanol. Initial concentrations were  $[L]=0.1696$  M,  $[Eu(III)]=0.030$  M at  $I=0.1$  M ( $Et_4NCl$ ).

| <b>Spectrum</b> | <b>A</b> | <b>B</b> | <b>C</b> | <b>D</b> | <b>F</b> | <b>G</b> | <b>H</b> | <b>I</b> |
|-----------------|----------|----------|----------|----------|----------|----------|----------|----------|
| H1              | 6.5301   | 6.5258   | 6.5109   | 6.5113   | 6.4876   | 6.4786   | 6.4621   | 6.455    |
| H2              | 6.8991   | 6.8881   | 6.8655   | 6.858    | 6.8327   | 6.8103   | 6.7888   | 6.7679   |

Table 8. NMR titration data (chemical shifts in ppm) for 3-nitrobenzoic acid and Eu(III) in methanol. Initial concentrations were [L]=0.1654 M, [Eu(III)]=0.030 M at  $I=0.1$  M (Et<sub>4</sub>NCl).

| <b>Spectrum</b> | <b>A</b> | <b>B</b> | <b>C</b> | <b>D</b> | <b>E</b> | <b>F</b> | <b>G</b> |
|-----------------|----------|----------|----------|----------|----------|----------|----------|
| H1              | 6.0564   | 6.0633   | 6.084    | 6.0962   | 6.1122   | 6.124    | 6.1316   |
| H2              | 7.1683   | 7.1797   | 7.2013   | 7.2215   | 7.2454   | 7.2681   | 7.2811   |

Table 9. NMR titration data (chemical shifts in ppm) for 4-nitrobenzoic acid and Eu(III) in methanol. Initial concentrations were [L]=0.2331 M, [Eu(III)]=0.030 M at  $I=0.1$  M (Et<sub>4</sub>NCl).

| <b>Spectrum</b> | <b>A</b> | <b>B</b> | <b>C</b> | <b>D</b> | <b>E</b> | <b>F</b> | <b>G</b> | <b>H</b> | <b>I</b> | <b>J</b> |
|-----------------|----------|----------|----------|----------|----------|----------|----------|----------|----------|----------|
| H1              | 6.4616   | 6.4588   | 6.4487   | 6.4538   | 6.4389   | 6.4358   | 6.4294   | 6.4019   | 6.3938   | 6.3821   |
